# Supplementary material for: Effects of High Fat Versus Normal Diet on Extracellular Vesicle–Induced Angiogenesis in a Swine Model of Chronic Myocardial Ischemia
Source: PubMed Central journal article supplement — J Am Heart Assoc. 2021 Jan 30;10(4):e017437. doi: 10.1161/JAHA.120.017437 (PMC7955347; doi:10.1161/jaha.120.017437), 2021-01-30
Supplement: JAH3-10-e017437-s001.pdf [file JAH3-10-e017437-s001.pdf]

# **SUPPLEMENTAL MATERIAL**

The FREQ Procedure

Frequency

| Interpretation                                                                                       | Table of Interpretation by Label |                 |                 |                                         |                                            |                                       |                                     |              |
|------------------------------------------------------------------------------------------------------|----------------------------------|-----------------|-----------------|-----------------------------------------|--------------------------------------------|---------------------------------------|-------------------------------------|--------------|
|                                                                                                      | Label                            |                 |                 |                                         |                                            |                                       |                                     |              |
|                                                                                                      | Difference in Effects            | Main Effect HFD | Main Effect MVs | Simple Effect of High Fat Diet with MVs | Simple Effect of High Fat Diet without MVs | Simple Effect of MVs in High Fat Diet | Simple Effect of MVs in Normal Diet | Total        |
| Diet did not significantly regulate gene with MVs                                                    | 0                                | 0               | 0               | 54                                      | 0                                          | 0                                     | 0                                   | 54           |
| Diet did not significantly regulate gene without MVs                                                 | 0                                | 0               | 0               | 0                                       | 24                                         | 0                                     | 0                                   | 24           |
| Diet did not significantly regulate gene, regardless of MVs                                          | 0                                | 7089            | 0               | 0                                       | 0                                          | 0                                     | 0                                   | 7089         |
| Gene more downregulated or less upregulated by MVs in High Fat diet than Normal (see Simple effects) | 28                               | 0               | 0               | 0                                       | 0                                          | 0                                     | 0                                   | 28           |
| Gene more upregulated or less downregulated by MVs in High Fat diet than Normal (see Simple effects) | 38                               | 0               | 0               | 0                                       | 0                                          | 0                                     | 0                                   | 38           |
| High Fat Diet downregulated gene relative to Normal Diet similarly, regardless of MVs                | 0                                | 84              | 0               | 0                                       | 0                                          | 0                                     | 0                                   | 84           |
| High Fat Diet downregulated gene relative to Normal Diet with MVs                                    | 0                                | 0               | 0               | 3                                       | 0                                          | 0                                     | 0                                   | 3            |
| High Fat Diet downregulated gene relative to Normal Diet without MVs                                 | 0                                | 0               | 0               | 0                                       | 21                                         | 0                                     | 0                                   | 21           |
| High Fat Diet upregulated gene relative to Normal Diet similarly, regardless of MVs                  | 0                                | 282             | 0               | 0                                       | 0                                          | 0                                     | 0                                   | 282          |
| High Fat Diet upregulated gene relative to Normal Diet with MVs                                      | 0                                | 0               | 0               | 9                                       | 0                                          | 0                                     | 0                                   | 9            |
| High Fat Diet upregulated gene relative to Normal Diet without MVs                                   | 0                                | 0               | 0               | 0                                       | 21                                         | 0                                     | 0                                   | 21           |
| MVs did not significantly regulate gene with High Fat Diet                                           | 0                                | 0               | 0               | 0                                       | 0                                          | 37                                    | 0                                   | 37           |
| MVs did not significantly regulate gene with Normal Diet                                             | 0                                | 0               | 0               | 0                                       | 0                                          | 0                                     | 47                                  | 47           |
| MVs did not significantly regulate gene, regardless of Diet                                          | 0                                | 0               | 7412            | 0                                       | 0                                          | 0                                     | 0                                   | 7412         |
| MVs downregulated gene relative to vehicle alone similarly, regardless of Diet                       | 0                                | 0               | 21              | 0                                       | 0                                          | 0                                     | 0                                   | 21           |
| MVs downregulated gene relative to vehicle alone with High Fat Diet                                  | 0                                | 0               | 0               | 0                                       | 0                                          | 12                                    | 0                                   | 12           |
| MVs downregulated gene relative to vehicle alone with Normal Diet                                    | 0                                | 0               | 0               | 0                                       | 0                                          | 0                                     | 10                                  | 10           |
| MVs upregulated gene relative to vehicle alone similarly, regardless of Diet                         | 0                                | 0               | 22              | 0                                       | 0                                          | 0                                     | 0                                   | 22           |
| MVs upregulated gene relative to vehicle alone with High Fat Diet                                    | 0                                | 0               | 0               | 0                                       | 0                                          | 17                                    | 0                                   | 17           |
| MVs upregulated gene relative to vehicle alone with Normal Diet                                      | 0                                | 0               | 0               | 0                                       | 0                                          | 0                                     | 9                                   | 9            |
| The effect of MVs did not depend on diet or vice versa (look to Main Effects)                        | 7455                             | 0               | 0               | 0                                       | 0                                          | 0                                     | 0                                   | 7455         |
| <b>Total</b>                                                                                         | <b>7521</b>                      | <b>7455</b>     | <b>7455</b>     | <b>66</b>                               | <b>66</b>                                  | <b>66</b>                             | <b>66</b>                           | <b>22695</b> |
